# Supplementary material for: Functional variation in phyllogen, a phyllody‐inducing phytoplasma effector family, attributable to a single amino acid polymorphism
Source: PubMed Central journal article supplement (PMC7488466; doi:10.1111/mpp.12981), 2020-08-19
Supplement: MPP-21-1322-s002.pdf [file MPP-21-1322-s002.pdf]

# Figure S2

(a)

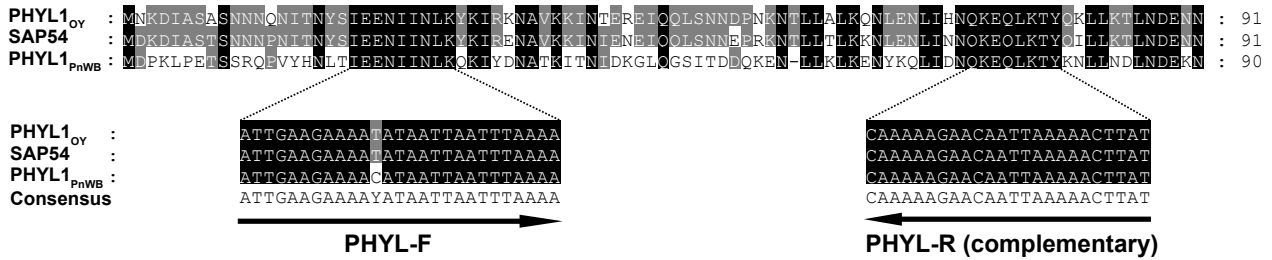

(b)

PCR amplification of partial phylogen sequence

Genome walking around PCR amplicon

Assemble and validation of the sequences

ORF search

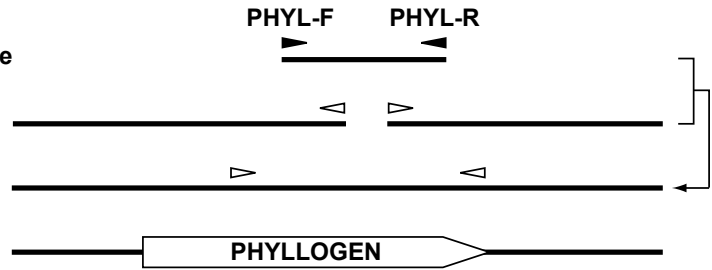

(c)

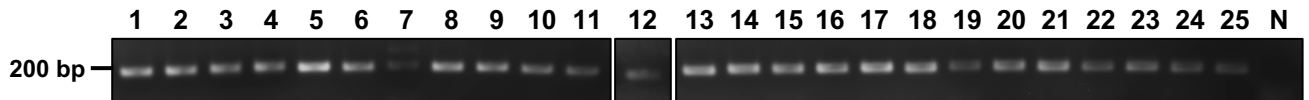

(d)

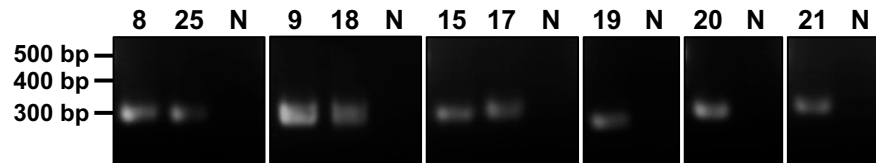

**Figure S2.** Identification of phylogens based on conserved  $\alpha$ -helical motifs.

(a) Multiple sequence alignment of three phylogens (PHYL1<sub>OY</sub>, PHYL1<sub>PnWB</sub>, and SAP54). Dark gray and black shading indicate more than 60% and 100% consensus in each column, respectively. Black horizontal arrows show locations of the PHYL-F/R primers for amplification of the partial sequence of the phylogen gene.

(b) Diagram for identifying phylogens in the genomic DNA of phytoplasmas. Filled arrowheads indicate PHYL-F/R primers. Open arrowheads indicate gene-specific primers (GSPs) for each phylogen.

(c) PCR amplification with PHYL-F/R of diverse phytoplasmas.

PCR analyses with the PHYL-F/R primer pair for detecting partial phylogen genes of 25 phytoplasma strains. 1: AY-J, 2: CA, 3:KVF, 4: DIV, 5:GY, 6: HBWB, 7: HYDF, 8: HP, 9: PvWB, 10: RhY, 11: SWB, 12: MD, 13: CLP, 14: CrP, 15: FBP, 16: SOYP, 17: WBDL, 18: SY, 19: ASHy2, 20: JHP, 21: RYD, 22: NaxY, 23: LUM, 24: PWB, 25: JWB, N: distilled water (negative control). Full strain names and GenBank accession numbers are listed in Table S1.

(d) Validation of genome walking analysis.

PCR analyses with gene specific primers designed on up- and downstream sequences. Each phytoplasma strain names are shown as (c).
