# Supplementary material for: Functional variation in phyllogen, a phyllody‐inducing phytoplasma effector family, attributable to a single amino acid polymorphism
Source: PubMed Central journal article supplement (PMC7488466; doi:10.1111/mpp.12981), 2020-08-19
Supplement: MPP-21-1322-s007.pdf [file MPP-21-1322-s007.pdf]

**Figure S7**

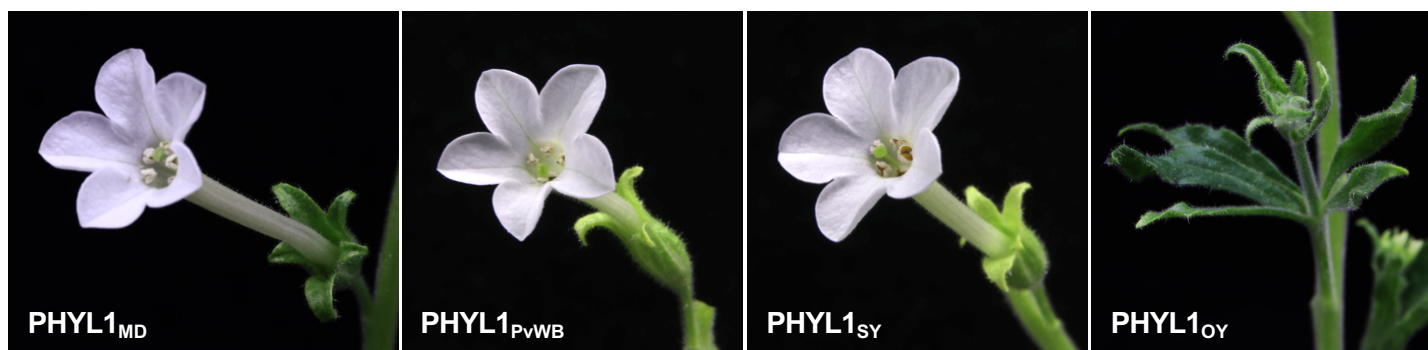

**Figure S7.** Floral phenotypes of *N. benthamiana* plants infected with TRV carrying phyllogens. Floral phenotypes of *N. benthamiana* plants infected with TRV vector carrying phyllogens belonging to either phyl-A (PHYL1<sub>OY</sub>) or phyl-B (PHYL1<sub>MD</sub>, PHYL1<sub>PWB</sub>, and PHYL1<sub>SY</sub>) group. Phyllogens belonging to phyl-B (PHYL1<sub>MD</sub>, PHYL1<sub>PWB</sub>, and PHYL1<sub>SY</sub>) induced no flower malformation.
