# Supplementary material for: Functional variation in phyllogen, a phyllody‐inducing phytoplasma effector family, attributable to a single amino acid polymorphism
Source: PubMed Central journal article supplement (PMC7488466; doi:10.1111/mpp.12981), 2020-08-19
Supplement: MPP-21-1322-s010.pdf [file MPP-21-1322-s010.pdf]

# Figure S10

## Phyl-A group

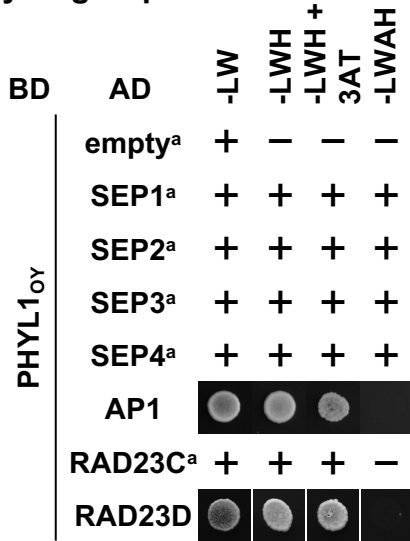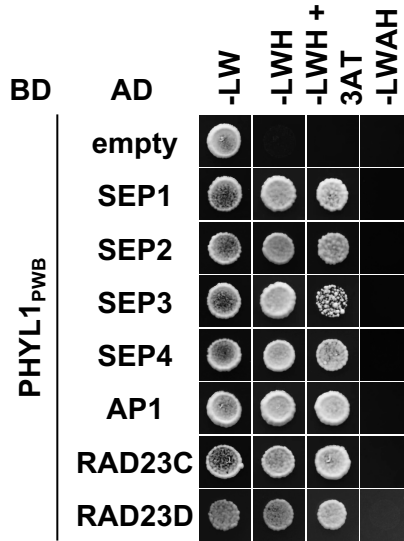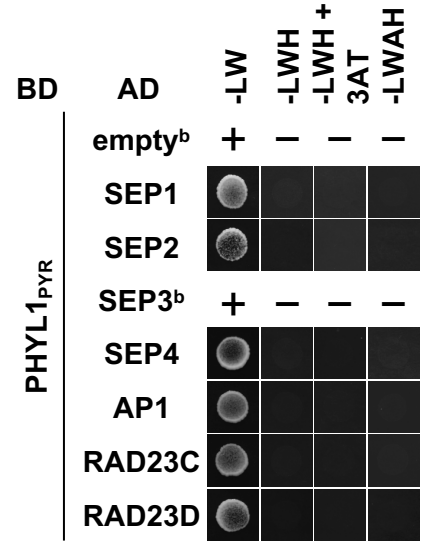

## Phyl-B group

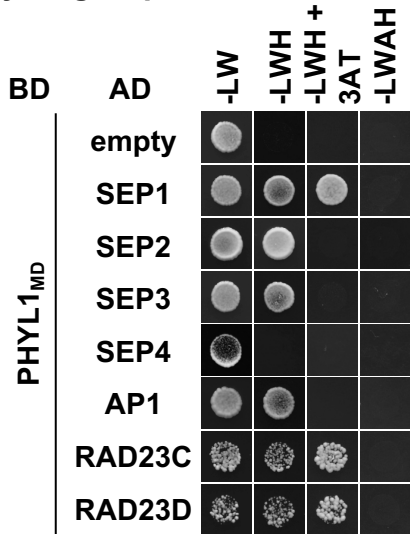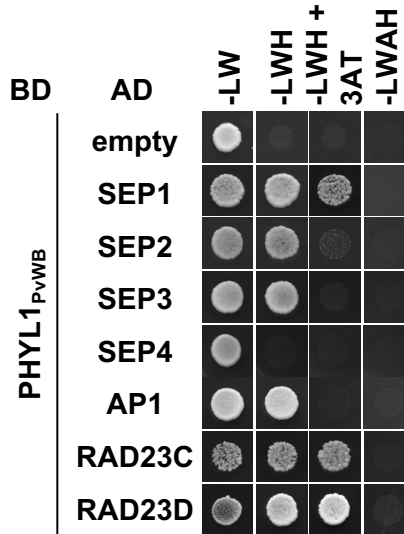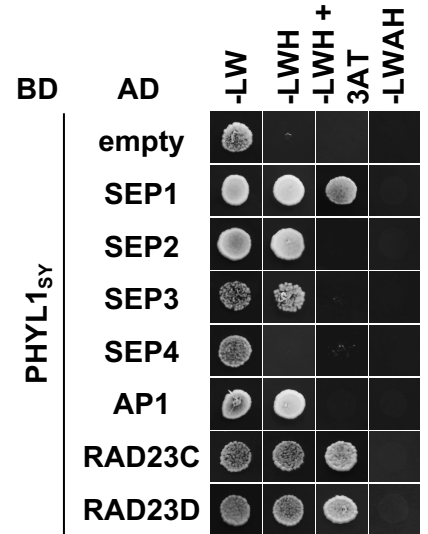

## Phyl-C group

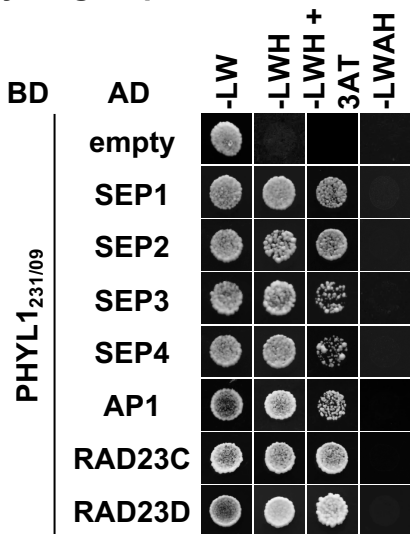

# Figure S10 continued

## Phyl-D group

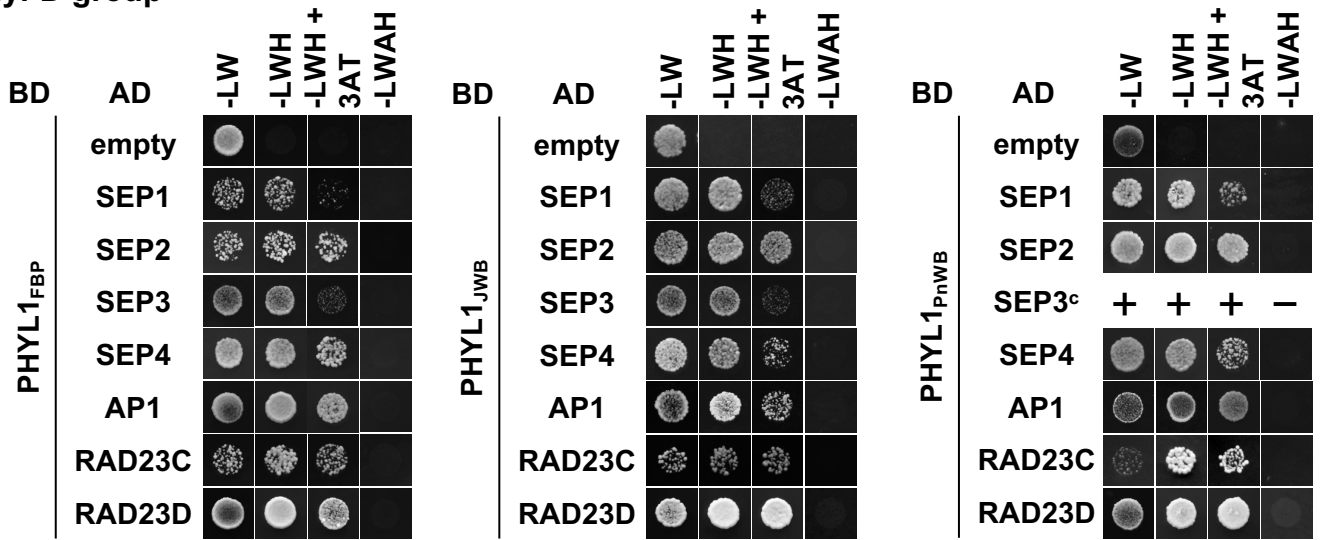

## PHYL1<sub>SY</sub> mutants

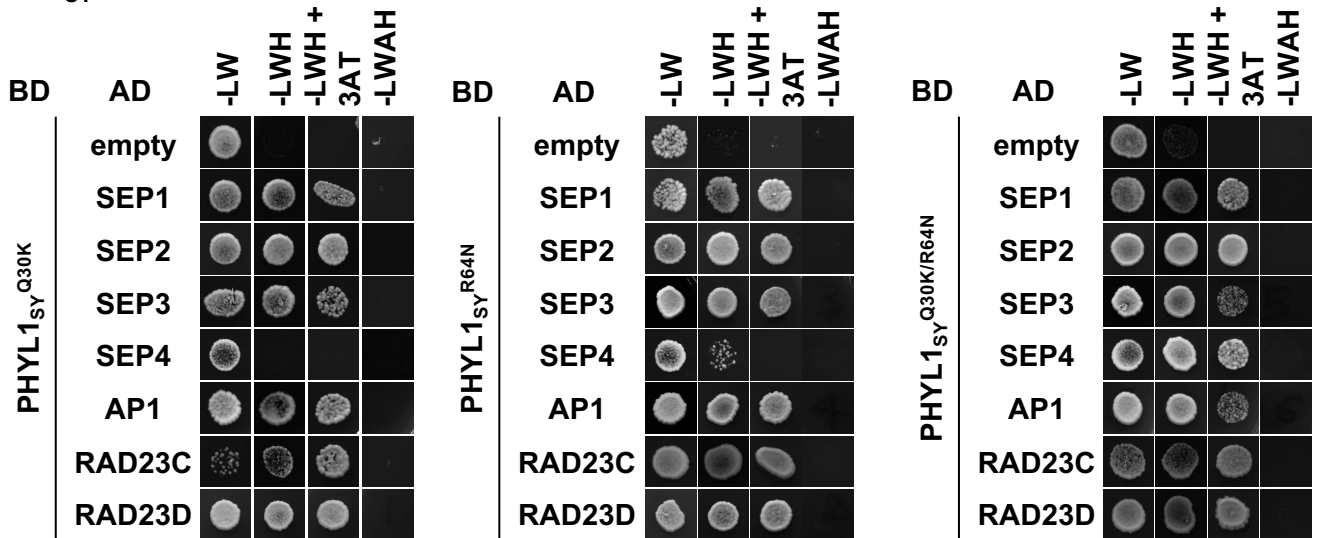

**Figure S10.** Growth of yeast on selective media in Y2H analyses.

An evaluation of protein interactions is summarized in Table 1. Several results indicated as + (yeast grew on selective media) or - (yeast did not grow on selective media) were previously reported in <sup>a</sup> Iwabuchi *et al.* (2019), <sup>b</sup> Maejima *et al.* (2014), or <sup>c</sup> Kitazawa *et al.* (2017).
